# Supplementary material for: Mycobacterial PE/PPE Proteins at the Host-Pathogen Interface
Source: Clin Dev Immunol. 2011 Jan 26;2011:497203. doi: 10.1155/2011/497203 (PMC3034920; doi:10.1155/2011/497203)
Supplement: Supplementary file 1 — Table S1: PE/PPE families—Immune recognition and functional data. Summary of published data on mycobacterial pe/ppe genome arrangement, essentiality, subcellular localization, cellular and humoral responses along with other relevant functional. [file 497203.f1.xls]

## Sheet: Table
		Table S1. PE/PPE families: Immune recognition and functional data
		Data on mycobacterial pe/ppe genome arrangement, essentiality, subcellular localization, cellular and humoral responses along with other relevant functional data is summarized below. The complete reference list is provided in accompanying worksheet. Where data was derived from mycobacteria other than M. tuberculosis, the applicable organism is indicated. Additional information is embedded in comm…
	PE/PPE Number	Rv number	bp size	aa size	kDa size	pe/ppe pair	Esx cluster	Essential in vitro	Essential in vivo	Sub-group	Surface associated	Exported	T cell response	B cell response	Elicits protective immunity	Possible diagnostic antigen	Other functional data
PE	PE1	Rv0151c	1767	589	61.4112					V							M. marinum pe1::tn defective for infection of, and growth within, in macrophages (Mehta et al, 2006)
	PE2	Rv0152c	1578	526	56.3535					III
	PE3	Rv0159c	1407	469	48.608					V				Y (Li et al, 2010)			Required for in vivo survival of M. marinum (Ruley et al, 2004)
	PE4	Rv0160c	1509	503	53.055					V
	PE5	Rv0285	309	103	9.5657	Y	Y (3)	Y		II	Y (Malen et al, 2010)	Y (Malen et al, 2007)		Y (Kunnath et al, 2010; Weldingh et al, 2005)
	PE6	Rv0335c	516	172	18.3878			Y		V
	PE7	Rv0916c	300	100	9.9174	Y	N			IV					N (with PPE14 - Vipond et al, 2006)
	PE8	Rv1040c	828	276	26.2246	Y	Y			IV
	PE9	Rv1088	435	145	15.3763					V
	PE10	Rv1089	363	121	11.7626					V
	PE11 (lipX)	Rv1169c	303	101	10.8401	Y	N	Y		IV	Y (Malen et al, 2010)			Y (Li et al, 2010; Narayana et al, 2007)	N (with PPE17 - Vipond et al, 2006)		Lipase activity (Deb et al, 2006)
	PE12	Rv1172c	927	309	31.0021					V
	PE13	Rv1195	300	100	9.58362	Y	Y			IV				Y (Kunnath et al, 2010)
	PE14	Rv1214c	333	111	10.8141					V
	PE15	Rv1386	309	103	9.83001	Y	N			II	Y (Malen et al, 2010)	Y (Malen et al, 2007)
	PE16	Rv1430	1587	529	54.5836					V
	PE17	Rv1646	933	311	30.2193					V					N (Vipond et al, 2006)
	PE18	Rv1788	300	100	9.55154	Y	Y (5)			IV			Y (Coler et al, 2009; M. avium - Parra et al, 2006)
	PE19	Rv1791	300	100	9.5836	Y	Y (5)			IV			Y (Coler et al, 2009; M. avium - Parra et al, 2006)
	PE20	Rv1806	300	100	9.82019	Y	N				Y (Malen et al, 2010)				Y (with PPE31 - Vipond et al, 2006)
	PE21	Rv2099c	174	58	5.51028					IV
	PE22	Rv2107	297	99	10.3737	Y	N			III
	PE23	Rv2328	1149	383	36.8327					V							BCG pe23::tn demonstrates reduced fitness in macrophages (Stewart et al, 2005)
	PE24	Rv2408	720	240	24.4766					V
	PE25	Rv2431c	300	100	10.6871	Y	N			III	Y (Malen et al, 2010)	Y (Malen et al, 2007)	Y (in complex with PPE41 - Tundup et al, 2008)	Y (in complex with PPE41 - Tundup et al, 2008)			PE25/PPE41 heterodimeric structure determined (Strong et al, 2006)
	PE26	Rv2519	1479	493	48.7522					V
	PE27	Rv2769c	828	276	26.3816	Y	N			IV
	PE27A	Rv3018A	87	29	2.66005	Y	Y
	PE29	Rv3022A	315	105	9.65079	Y	Y
	PE31	Rv3477	297	99	9.76289	Y	N			IV			N (Sidders et al, 2005)
	PE32	Rv3622c	300	100	9.69791	Y	Y			IV
	PE33	Rv3650	285	95	9.55968					V
	PE34	Rv3746c	336	112	11.496					I
	PE35	Rv3872	300	100	9.92776	Y	Y (1)		Y	I		Y (Malen et al, 2007; Fortune et al, 2005)	Y (Cockle et al, 2002; Mustafa et al, 2002)	Y (Daugelat et al, 2003)		Y (Cockle et al, 2002)
	PE36	Rv3893c	234	78	7.42426	Y	Y (2)			III
PE_PGRS	PE_PGRS1	Rv0109	1491	497	42.2884					V				Y (Li et al, 2010)
	PE_PGRS2	Rv0124	1464	488	40.8906					V				Y (Li et al, 2010)
	PE_PGRS3	Rv0278c	2874	958	81.9039					V
	PE_PGRS4	Rv0279c	2514	838	68.9859					V
	PE_PGRS5	Rv0297	1776	592	49.0254					V							BCG pe_pgrs5::tn enriched in acidified phagosomes (Stewart et al, 2005)
	PE_PGRS6	Rv0532	1785	595	50.835					V				Y (Li et al, 2010)
	PE_PGRS7	Rv0578c	3921	1307	105.963					V	Y (Malen et al, 2010)
	PE_PGRS8	Rv0742	528	176	15.5272					V
	PE_PGRS9	Rv0746	2352	784	64.1577					V
	PE_PGRS10	Rv0747	2406	802	65.4066					V
	PE_PGRS11	Rv0754	1755	585	56.9449					V							Interacts with TLR-2 & induces DC maturation (Bansal et al, 2010); Facilitates resistance to oxidative stress (Chaturvedi et al, 2010)
	PE_PGRS12	Rv0832	414	138	13.0636					V
	PE_PGRS13	Rv2250	2250	750	57.4291					V				Y (Narayana et al, 2007)
	PE_PGRS14	Rv0834	2649	883	71.6985					V
	PE_PGRS15	Rv0872c	1821	607	50.2676					V
	PE_PGRS16	Rv0977	2772	924	81.6034					V
	PE_PGRS17	Rv0978c	996	332	31.019					V							Interacts with TLR-2 & induces DC maturation (Bansal et al, 2010); PGRS domain appears to limit proteasomal degradation (Koh et al, 2009)
	PE_PGRS18	Rv0980c	1374	458	42.0747					V				Y (Banu et al, 2002)
	PE_PGRS19	Rv1067c	2004	668	54.6921					V				Y (Banu et al, 2002)
	PE_PGRS20	Rv1068c	1392	464	39.3052					V				Y (Banu et al, 2002)
	PE_PGRS21	Rv1087	2304	768	62.469					V
	PE_PGRS22	Rv1091	2562	854	68.3166					V	Y (M. immunogenum - Gupta et al, 2008)
	PE_PGRS23	Rv1243c	1689	563	47.2849					V
	PE_PGRS24	Rv1325c	1812	604	49.5747					V	Y (Malen et al, 2010)
	PE_PGRS25	Rv1396c	1731	577	47.8994					V
	PE_PGRS26	Rv1441c	1476	492	40.8097					V				Y (Banu et al, 2002; Singh et al, 2008)			M. smegmatis expressing PE_PGRS26 shows increased persistence in macrophages (Singh et al, 2008)
	PE_PGRS27	Rv1450c	3990	1330	107.409					V
	PE_PGRS28	Rv1452c	2226	742	61.0871					V							BCG pe_pgrs28::tn enriched in acidified phagosomes (Stewart et al, 2005)
	PE_PGRS29	Rv1468c	1113	371	32.2156					V	Y (Malen et al, 2010)			Y (Li et al, 2010)
	PE_PGRS30	Rv1651c	3036	1012	88.4548					V	Y (M. marinum - Sani et al, 2010)						M. marinum orthologue required for macrophage replication and granuloma persistence (Ramakrishnan et al, 2000)
	Wag22	Rv1759c	2745	915	74.3536							Y (Malen et al, 2007)	Y (Campuzano et al, 2007)		Y (Campuzano et al, 2007)
	PE_PGRS31	Rv1768	1857	619	51.9627					V			poor (Cockle et al, 2002)
	PE_PGRS32	Rv1803c	1920	640	54.8494					V				Y (Li et al, 2010)
	PE_PGRS33	Rv1818c	1497	499	40.755					V			Y (Bertholet et al, 2008, Chaitra et al, 2007, 2008a, c), Y - PE domain alone elicits predominantly T cell response (Delogu et al, 2001)	Y (Chaitra et al, 2007; Narayana et al, 2007; Singh et al, 2008); Y - PE_PGRS domain elicits predominantly B cell response (Delogu et al, 2001);	PE domain alone elicits protection, not full-length PE_PGRS (Delogu et al, 2001)		Triggers apoptosis (Balaji et al, 2007, Basu et al, 2007), interacts with TLR-2 (Basu et al, 2007); influences cell-cell interactions (Brennan et al, 2001), reduced uptake of BCG pe_pgrs33::tn by macrophages (Brennan et al, 2001); expression in M. smegmatis results in enhanced persistence in macrophages; (Dheenadhayalan et al, 2006; Singh et al, 2008); cell wall localization (Cascioferro et al, 2…
	PE_PGRS34	Rv1840c	1548	516	43.9156					V					N (Vipond et al, 2006)
	PE_PGRS35	Rv1983	1677	559	53.7056					V			Y (Cockle et al, 2002)	Y (Banu et al, 2002)		Y (Cockle et al, 2002)
	PE_PGRS36	Rv2098c	1305	435	36.5293					V
	PE_PGRS37	Rv2126c	771	257	20.3059					V
	PE_PGRS38	Rv2162c	1599	533	44.4786					V
	PE_PGRS39	Rv2340c	1242	414	38.7222					V
	PE_PGRS40	Rv2371	186	62	5.97781					V
	PE_PGRS41	Rv2396	1086	362	30.724					V							BCG pe_pgrs41::tn demonstrates reduced fitness in macrophages (Stewart et al, 2005)
	PE_PGRS42	Rv2487c	2085	695	57.1857					V
	PE_PGRS43	Rv2490c	4983	1661	133.123					V
	PE_PGRS44	Rv2591	1632	544	46.2871					V							BCG pe_pgrs44::tn enriched in acidified phagosomes (Stewart et al, 2005)
	PE_PGRS45	Rv2615c	1386	462	39.3104					V		Y (Abdallah et al, 2009)
	PE_PGRS46	Rv2634c	2337	779	63.1304					V
	PE_PGRS47	Rv2741	1578	526	44.2099					V				Y (Li et al, 2010)
	PE_PGRS48	Rv2853	1848	616	51.2566					V
	PE_PGRS49	Rv3344c	1455	485	37.4904					V
	PE_PGRS50	Rv3345c	4617	1539	129.385					V
	PE_PGRS51	Rv3367	1767	589	49.7074					V				Y (Singh et al, 2001)		Y (Singh et al, 2001)
	PE_PGRS52	Rv3388	2196	732	60.4539					V
	PE_PGRS53	Rv3507	4146	1382	110.623					V
	PE_PGRS54	Rv3508	5706	1902	147.625					V
	PE_PGRS55	Rv3511	2145	715	59.9578					V
	PE_PGRS56	Rv3512	3240	1080	81.1615					V
	PE_PGRS57	Rv3514	4470	1490	115.753					V
	PE_PGRS58	Rv3590	1755	585	48.3982					V
	PE_PGRS59	Rv3595c	1320	440	37.1424					V							BCG pe_pgrs59::tn enriched in acidified phagosomes (Stewart et al, 2005)
	PE_PGRS60	Rv3652	315	105	10.6362					V
	PE_PGRS61	Rv3653	588	196	15.8008					V
	PE_PGRS62	Rv3812	1515	505	51.7891					V			Y (Chaitra et al, 2008a, b, c)	Y (Li et al, 2010)	Y (Vipond et al, 2006)	Y (Koh et al, 2009)	Expression in M. smegmatis decreases expression of pro-inflammatory cytokines (Huang et al, 2010); M. marinum orthologue required for macrophage replication and granuloma persistence (Ramakrishnan et al, 2000); BCG pe_pgrs62::tn demosntrates reduced fitness in macrophages (Stewart et al, 2005)
	PE_PGRS63 (lipY)	Rv3097c	1314	438	44.9911					V	Y (Mishra et al, 2008)						TAG hydrolase activity (Mishra et al, 2008)
PPE	PPE1	Rv0096	1392	464	46.8949					II							Required for survival in macrophages (Rengarajan et al, 2005)
	PPE2	Rv0256c	1671	557	56.9518					II							BCG ppe2::tn demonstrates reduced fitness in macrophages (Stewart et al, 2005)
	PPE3	Rv0280	1611	537	54.7071					II				Y (Kunnath et al, 2010)
	PPE4	Rv0286	1542	514	51.7877	Y	Y (3)	Y		II				Y (Kunnath et al, 2010)
	PPE9	Rv0388c	543	181	18.5867					IV
	PPE11	Rv0453	1557	519	52.8365					II
	PPE14	Rv0915c	1272	424	41.4397	Y	N			IV			Y (Skeiky et al, 2000; Mustafa et al, 2006; Bertholet et al, 2008)		Y (Skeiky et al, 2000); N (with PE7 - Vipond et al, 2006)
	PPE15	Rv1039c	1176	392	38.0812	Y	Y			IV				Y (Li et al, 2010)
	PPE17	Rv1168c	1041	347	35.8211	Y	N			IV					N (with PE11 - Vipond et al, 2006)
	PPE18	Rv1196	1176	392	39.1583	Y	Y			IV	Y (Malen et al, 2010)		Y (Dillon et al, 1999; Mustafa et al, 2006; Bertholet et al, 2008; Kahn et al, 2008 )	Y (Kahn et al, 2008; Kunnath et al, 2010)	Y (Skeiky et al, 2000); N (with PE7 - Vipond et al, 2006)	Y (Kahn et al, 2008)	Interacts with TLR-2, activates IL10 induction (Nair et al, 2009)
	PPE19	Rv1361c	1191	397	39.9834					IV
	PPE20	Rv1387	1620	540	55.4034	Y	N			II	Y (Malen et al, 2010)
	PPE22	Rv1705c	1158	386	38.4435					IV				Y (Li et al, 2010)			Required for in vivo survival of M. marinum (Ruley et al, 2004)
	PPE23	Rv1706c	1185	395	39.7781					IV
	PPE25	Rv1787	1098	366	37.0722	N	Y (5)			IV							M. avium orthologue implicated in preventing phagosome-lysosome fusion (Li et al, 2005)
	PPE26	Rv1789	1182	394	38.5886	Y	Y (5)			IV	Y (Malen et al, 2010; M. avium - Newton et al, 2009)		Y (Bertholet et al, 2008)	Y (Ireton et al, 2010; M. avium - Newton et al, 2008)		Y (Ireton et al, 2010)	M. avium orthologue implicated in vacuole remodelling (Jha et al, 2010)
	PPE27	Rv1790	1053	351	35.4594	N	Y (5)			IV
	PPE29	Rv1801	1272	424	41.4771					IV
	PPE30	Rv1802	1392	464	46.021					IV
	PPE31	Rv1807	1200	400	38.8688	Y	N		Y	IV
	PPE32	Rv1808	1230	410	39.8992					IV	Y (Malen et al, 2010)		Y (M. avium orthologue, Nagata et al, 2005)				M. avium orthologue induces IL-10 production (Nagata et al, 2010)
	PPE33	Rv1809	1407	469	47.1562					IV	Y (Malen et al, 2010)
	PPE36	Rv2108	732	244	27.4798	Y	N			III	Y (Le Moigne et al, 2005; M. immunogenum - Gupta et al, 2008)
	PPE37	Rv2123	1422	474	48.5311					II
	PPE38	Rv2352c	1176	392	37.3548					IV
	PPE41	Rv2430c	585	195	21.9427	Y	N			III		Y (Abdallah, 2006; Malen et al, 2007)	Y (Tundup et al, 2008)	Y (Tundup et al, 2008)			PE25/PPE41 heterodimeric structure determined (Strong et al, 2006)
	PPE43	Rv2768c	1185	395	38.6269	Y	N			IV
	PPE44	Rv2770c	1149	383	37.4353					IV			Y (Bonanni et al, 2005; Romano et al, 2008)	Y (Bonanni et al, 2005; Romano et al, 2008)	Y (Romano et al, 2008)
	PPE45	Rv2892c	1227	409	41.4508					IV
	PPE46	Rv3018c	1305	435	42.9973	Y	Y	Y		II			Y (Chaitra et al, 2008a, b, c)
	PPE47	Rv3021c	1077	359	35.1306									Y (Kunnath et al, 2010)
	PPE48	Rv3022c	243	81	8.05816	Y	Y			II				Y (Kunnath et al, 2010)
	PPE49	Rv3125c	1176	392	38.5855					IV
	PPE50	Rv3135	399	133	13.6674			Y		IV
	PPE51	Rv3136	1143	381	37.9798					IV	Y (Malen et al, 2010)			Y (Li et al, 2010)
	PPE57	Rv3425	531	177	19.855					III			Y (Wang et al, 2009)	Y (Zhang et al, 2006)		Y (Zhang et al, 2006)
	PPE58	Rv3426	699	233	25.8724					III
	PPE59	Rv3429	537	179	19.8112					III
	PPE60	Rv3478	1182	394	39.3815	Y	N			IV	Y (Malen et al, 2010)		Y (Bertholet et al, 2008)		Y (Bertholet et al, 2008)
	PPE61	Rv3532	1221	407	41.5492					IV
	PPE63	Rv3539	1440	480	49.9694
	PPE65	Rv3621c	1242	414	40.6798	Y	Y			IV
	PPE66	Rv3738c	948	316	31.4355
	PPE67	Rv3739c	234	78	7.72161					II
	PPE68	Rv3873	1107	369	37.3299	Y	Y (1)		Y	I	Y (Demangel, 2004; Malen et al, 2010; M. marinum - Sani et al, 2010)		Y (Cockle et al, 2002; Mustafa et al, 2002; Okkels et al, 2003; Weldingh et al, 2005)	Y (Daugelat et al, 2003)		Y (Cockle et al, 2002)	Glycosylation of C-terminal observed (Daugelat et al, 2003);
	PPE69	Rv3892c	1200	400	38.8525	Y	Y (2)			III
PPE_MPTR
	PPE_MPTR5	Rv0304c	6615	2205	215.55					V
	PPE_MPTR6	Rv0305c	2892	964	98.9685					V							Required for in vivo survival of M. marinum (Ruley et al, 2004)
	PPE_MPTR7	Rv0354c	426	142	14.39					(V)
	PPE_MPTR8	Rv0355c	9903	3301	326.779					V
	PPE_MPTR10	Rv0442c	1464	488	47.2138					V		Y (Abdallah et al, 2009)					BCG ppe_mptr10::tn enriched in acidified phagosomes (Stewart et al, 2005)
	PPE_MPTR12	Rv0755c	1938	646	62.6928			Y		V		Y (Malen et al, 2007)					BCG ppe12::tn more resistant to ampicillin (Danilchanka et al, 2008)
	PPE_MPTR13	Rv0878c	1332	444	43.5918					V		Y (Abdallah et al, 2009)					BCG ppe_mptr13::tn demonstrates reduced fitness in macrophages (Stewart et al, 2005)
	PPE_MPTR16	Rv1135c	1857	619	60.2064					V							BCG ppe_mptr16::tn enriched in acidified phagosomes (Stewart et al, 2005)
	PPE_MPTR21	Rv1548c	2037	679	66.7364					V							Required for in vivo survival of M. marinum (Ruley et al, 2004); BCG ppe_mptr21::tn enriched in acidified phagosomes (Stewart et al, 2005)
	PPE_MPTR24	Rv1753c	3162	1054	104.65			Y		V							BCG ppe_mptr24::tn more resistant to ampicillin (Danilchanka et al, 2008); M. marinum ppe24::tn defective for growth in macrophages (Mehta et al, 2006)
	PPE_MPTR28	Rv1800	1968	656	67.0672					V
	PPE_MPTR34	Rv1917c	4380	1460	142.943					V	Y (M. smegmatis - Sampson et al, 2001)				N (Vipond et al, 2006)		Interacts with TLR-2 & induces DC maturation (Bansal et al, 2010)
	PPE_MPTR35	Rv1918c	2964	988	97.9503					V
	PPE_MPTR39	Rv2353c	1065	355	34.0687
	PPE_MPTR40	Rv2356c	1848	616	58.3583					V							Required for in vivo survival of M. marinum (Ruley et al, 2004)
	PPE_MPTR42	Rv2608	1743	581	59.6744					V			Y (Bertholet et al, 2008)	Y (Choudhary et al, 2003; Ireton et al, 2010)	Y (Bertholet et al, 2008; Baldwin et al, 2009 - with Rv1813 and Rv3620)	Y (Ireton et al, 2010)
	PPE_MPTR52	Rv3144c	1230	410	39.0665					V
	PPE_MPTR53	Rv3159c	1773	591	56.5854					V							BCG ppe_mptr53::tn more resistant to ampicillin (Danilchanka et al, 2008); M. marinum ppe53::tn defective for infection of, and growth within, macrophages (Mehta et al, 2006); Required for in vivo survival of M. marinum (Ruley et al, 2004)
	PPE_MPTR54	Rv3343c	7572	2524	250.175			Y		V							Plays role in blocking trafficking of MTb to acidified phagosomes (Brodin et al, 2010); Required for in vivo survival of M. marinum (Ruley et al, 2004)
	PPE_MPTR55	Rv3347c	9474	3158	309.369					V				Y (Singh et al, 2001)		Y (Singh et al, 2001)
	PPE_MPTR56	Rv3350c	11151	3717	363.193					V
	PPE_MPTR62	Rv3533c	1749	583	55.5033					V
	PPE_MPTR64	Rv3558	1659	553	53.6805					V	Y (M. marinum - Sani et al, 2010)

## Sheet: Reference list
Table S1 Reference list
1	Abdallah, A. M., T. Verboom, F. Hannes, M. Safi, M. Strong, D. Eisenberg, R. J. Musters, C. M. Vandenbroucke-Grauls, B. J. Appelmelk, J. Luirink, and W. Bitter. 2006. A specific secretion system mediates PPE41 transport in pathogenic mycobacteria. Molecular Microbiology 62:667-679.
2	Abdallah, A. M., T. Verboom, E. M. Weerdenburg, N. C. Gey van Pittius, P. W. Mahasha, C. Jimenez, M. Parra, N. Cadieux, M. J. Brennan, B. J. Appelmelk, and W. Bitter. 2009. PPE and PE_PGRS proteins of Mycobacterium marinum are transported via the type VII secretion system ESX-5. Molecular Microbiology 73:329-340.
3	Balaji, K. N., G. Goyal, Y. Narayana, M. Srinivas, R. Chaturvedi, and S. Mohammad. 2007. Apoptosis triggered by Rv1818c, a PE family gene from Mycobacterium tuberculosis is regulated by mitochondrial intermediates in T cells. Microbes and Infection 9:271-281.
4	Bansal, K., S. R. Elluru, Y. Narayana, R. Chaturvedi, S. A. Patil, S. V. Kaveri, J. Bayry, and K. N. Balaji. 2010. PE_PGRS antigens of Mycobacterium tuberculosis induce maturation and activation of human dendritic cells. Journal of Immunology 184:3495-3504.
5	Bansal, K., A. Y. Sinha, D. S. Ghorpade, S. K. Togarsimalemath, S. A. Patil, S. V. Kaveri, K. N. Balaji, and J. Bayry. 2010. SH3-interacting domain of Rv1917c of Mycobacterium tuberculosis induces selective maturation of human dendritic cells by regulating PI3K-MAPK-NF-{kappa}B signaling and drives Th2 immune responses. Journal of Biological Chemistry.
6	Banu, S., N. Honore, B. Saint-Joanis, D. Philpott, M. C. Prevost, and S. T. Cole. 2002. Are the PE-PGRS proteins of Mycobacterium tuberculosis variable surface antigens? Molecular Microbiology 44:9-19.
7	Basu, S., S. K. Pathak, A. Banerjee, S. Pathak, A. Bhattacharyya, Z. Yang, S. Talarico, M. Kundu, and J. Basu. 2007. Execution of macrophage apoptosis by PE_PGRS33 of Mycobacterium tuberculosis is mediated by Toll-like receptor 2-dependent release of tumor necrosis factor-alpha. Journal of Biological Chemistry 282:1039-1050.
8	Bertholet, S., G. C. Ireton, M. Kahn, J. Guderian, R. Mohamath, N. Stride, E. M. Laughlin, S. L. Baldwin, T. S. Vedvick, R. N. Coler, and S. G. Reed. 2008. Identification of human T cell antigens for the development of vaccines against Mycobacterium tuberculosis. Journal of Immunology 181:7948-7957.
9	Baldwin, S.L., S. Bertholet, Kahn, M., I. Zharkikh, G.C. Ireton, S. Vedvick, S.G. Reed, and R.N. Coler. 2009. Intradermal immunization improves protective efficacy of a novel TB vaccine candidate. Vaccine. 27:3063-3071
10	Bonanni, D., L. Rindi, N. Lari, and C. Garzelli. 2005. Immunogenicity of mycobacterial PPE44 (Rv2770c) in Mycobacterium bovis BCG-infected mice. J Med Microbiol 54:443-448.
11	Brennan, M. J., G. Delogu, Y. Chen, S. Bardarov, J. Kriakov, M. Alavi, and W. R. Jacobs, Jr. 2001. Evidence that mycobacterial PE_PGRS proteins are cell surface constituents that influence interactions with other cells. Infection and Immunity 69:7326-7333.
12	Brodin, P., Y. Poquet, F. Levillain, I. Peguillet, G. Larrouy-Maumus, M. Gilleron, F. Ewann, T. Christophe, D. Fenistein, J. Jang, M. S. Jang, S. J. Park, J. Rauzier, J. P. Carralot, R. Shrimpton, A. Genovesio, J. A. Gonzalo-Asensio, G. Puzo, C. Martin, R. Brosch, G. R. Stewart, B. Gicquel, and O. Neyrolles. 2010. High content phenotypic cell-based visual screen identifies Mycobacterium tuberculo…
13	Campuzano, J., D. Aguilar, K. Arriaga, J. C. Leon, L. P. Salas-Rangel, J. Gonzalez-y-Merchand, R. Hernandez-Pando, and C. Espitia. 2007. The PGRS domain of Mycobacterium tuberculosis PE_PGRS Rv1759c antigen is an efficient subunit vaccine to prevent reactivation in a murine model of chronic tuberculosis. Vaccine 25:3722-3729.
14	Cascioferro, A., G. Delogu, M. Colone, M. Sali, A. Stringaro, G. Arancia, G. Fadda, G. Palu, and R. Manganelli. 2007. PE is a functional domain responsible for protein translocation and localization on mycobacterial cell wall. Molecular Microbiology 66:1536-1547.
15	Chaitra, M. G., M. S. Shaila, N. R. Chandra, and R. Nayak. 2008. HLA-A*0201-restricted cytotoxic T-cell epitopes in three PE/PPE family proteins of Mycobacterium tuberculosis. Scand J Immunol 67:411-417.
16	Chaitra, M. G., M. S. Shaila, and R. Nayak. 2008. Characterization of T-cell immunogenicity of two PE/PPE proteins of Mycobacterium tuberculosis. J Med Microbiol 57:1079-1086.
17	Chaitra, M. G., M. S. Shaila, and R. Nayak. 2008. Detection of interferon gamma-secreting CD8+ T lymphocytes in humans specific for three PE/PPE proteins of Mycobacterium tuberculosis. Microbes Infect 10:858-867.
18	Chaitra, M. G., M. S. Shaila, and R. Nayak. 2007. Evaluation of T-cell responses to peptides with MHC class I-binding motifs derived from PE_PGRS 33 protein of Mycobacterium tuberculosis. J Med Microbiol 56:466-474.
19	Choudhary, R. K., S. Mukhopadhyay, P. Chakhaiyar, N. Sharma, K. J. Murthy, V. M. Katoch, and S. E. Hasnain. 2003. PPE antigen Rv2430c of Mycobacterium tuberculosis induces a strong B-cell response. Infect Immun 71:6338-6343.
20	Cockle, P. J., S. V. Gordon, A. Lalvani, B. M. Buddle, R. G. Hewinson, and H. M. Vordermeier. 2002. Identification of novel Mycobacterium tuberculosis antigens with potential as diagnostic reagents or subunit vaccine candidates by comparative genomics. Infection and Immunity 70:6996-7003.
21	Coler, R. N., A. Bhatia, J. F. Maisonneuve, P. Probst, B. Barth, P. Ovendale, H. Fang, M. Alderson, Y. Lobet, J. Cohen, P. Mettens, and S. G. Reed. 2009. Identification and characterization of novel recombinant vaccine antigens for immunization against genital Chlamydia trachomatis. FEMS Immunol Med Microbiol 55:258-270.
22	Danilchanka, O., C. Mailaender, and M. Niederweis. 2008. Identification of a novel multidrug efflux pump of Mycobacterium tuberculosis. Antimicrob Agents Chemother 52:2503-2511.
23	Daugelat, S., J. Kowall, J. Mattow, D. Bumann, R. Winter, R. Hurwitz, and S. H. Kaufmann. 2003. The RD1 proteins of Mycobacterium tuberculosis: expression in Mycobacterium smegmatis and biochemical characterization. Microbes and Infection 5:1082-1095.
24	Deb, C., J. Daniel, T. D. Sirakova, B. Abomoelak, V. S. Dubey, and P. E. Kolattukudy. 2006. A novel lipase belonging to the hormone-sensitive lipase family induced under starvation to utilize stored triacylglycerol in Mycobacterium tuberculosis. Journal of Biological Chemistry 281:3866-3875.
25	Delogu, G., and M. J. Brennan. 2001. Comparative immune response to PE and PE_PGRS antigens of Mycobacterium tuberculosis. Infection and Immunity 69:5606-5611.
26	Delogu, G., C. Pusceddu, A. Bua, G. Fadda, M. J. Brennan, and S. Zanetti. 2004. Rv1818c-encoded PE_PGRS protein of Mycobacterium tuberculosis is surface exposed and influences bacterial cell structure. Molecular Microbiology 52:725-733.
27	Demangel, C., P. Brodin, P. J. Cockle, R. Brosch, L. Majlessi, C. Leclerc, and S. T. Cole. 2004. Cell envelope protein PPE68 contributes to Mycobacterium tuberculosis RD1 immunogenicity independently of a 10-kilodalton culture filtrate protein and ESAT-6. Infection and Immunity 72:2170-2176.
28	Dheenadhayalan, V., G. Delogu, and M. J. Brennan. 2006. Expression of the PE_PGRS 33 protein in Mycobacterium smegmatis triggers necrosis in macrophages and enhanced mycobacterial survival. Microbes and Infection 8:262-272.
29	Dillon, D. C., M. R. Alderson, C. H. Day, D. M. Lewinsohn, R. Coler, T. Bement, A. Campos-Neto, Y. A. Skeiky, I. M. Orme, A. Roberts, S. Steen, W. Dalemans, R. Badaro, and S. G. Reed. 1999. Molecular characterization and human T-cell responses to a member of a novel Mycobacterium tuberculosis mtb39 gene family. Infection and Immunity 67:2941-2950.
30	Gey van Pittius, N. C., S. L. Sampson, H. Lee, Y. Kim, P. D. van Helden, and R. M. Warren. 2006. Evolution and expansion of the Mycobacterium tuberculosis PE and PPE multigene families and their association with the duplication of the ESAT-6 (esx) gene cluster regions. BMC Evolutionary Biology 6:95.
31	Gupta, M. K., V. Subramanian, and J. S. Yadav. 2009. Immunoproteomic identification of secretory and subcellular protein antigens and functional evaluation of the secretome fraction of Mycobacterium immunogenum, a newly recognized species of the Mycobacterium chelonae-Mycobacterium abscessus group. Journal of Proteome Research 8:2319-2330.
32	Huang, Y., Y. Wang, Y. Bai, Z. G. Wang, L. Yang, and D. Zhao. 2010. Expression of PE_PGRS 62 protein in Mycobacterium smegmatis decrease mRNA expression of proinflammatory cytokines IL-1beta, IL-6 in macrophages. Mol Cell Biochem 340:223-229.
33	Ireton, G. C., R. Greenwald, H. Liang, J. Esfandiari, K. P. Lyashchenko, and S. G. Reed. 2010. Identification of Mycobacterium tuberculosis antigens of high serodiagnostic value. Clinical and Vaccine Immunology.
34	Jha, S. S., L. Danelishvili, D. Wagner, J. Maser, Y. J. Li, I. Moric, S. Vogt, Y. Yamazaki, B. Lai, and L. E. Bermudez. 2010. Virulence-related Mycobacterium avium subsp hominissuis MAV_2928 gene is associated with vacuole remodeling in macrophages. BMC Microbiology 10:100.
35	Khan, N., K. Alam, S. Nair, V. L. Valluri, K. J. Murthy, and S. Mukhopadhyay. 2008. Association of strong immune responses to PPE protein Rv1168c with active tuberculosis. Clinical Vaccine Immunology 15:974-980.
36	Koh, K. W., N. Lehming, and G. T. Seah. 2009. Degradation-resistant protein domains limit host cell processing and immune detection of mycobacteria. Molecular Immunology 46:1312-1318.
37	Koh, K. W., S. E. Soh, and G. T. Seah. 2009. Strong antibody responses to Mycobacterium tuberculosis PE-PGRS62 protein are associated with latent and active tuberculosis. Infection and Immunity 77:3337-3343.
38	Kunnath-Velayudhan, S., H. Salamon, H. Y. Wang, A. L. Davidow, D. M. Molina, V. T. Huynh, D. M. Cirillo, G. Michel, E. A. Talbot, M. D. Perkins, P. L. Felgner, X. Liang, and M. L. Gennaro. 2010. Dynamic antibody responses to the Mycobacterium tuberculosis proteome. Proc Natl Acad Sci U S A 107:14703-14708.
39	Le Moigne, V., G. Robreau, C. Borot, J. L. Guesdon, and W. Mahana. 2005. Expression, immunochemical characterization and localization of the Mycobacterium tuberculosis protein p27. Tuberculosis (Edinb) 85:213-219.
40	Li, A. H., S. J. Waddell, J. Hinds, C. A. Malloff, M. Bains, R. E. Hancock, W. L. Lam, P. D. Butcher, and R. W. Stokes. 2010. Contrasting transcriptional responses of a virulent and an attenuated strain of Mycobacterium tuberculosis infecting macrophages. PLoS One 5:e11066.
41	Li, Y., E. Miltner, M. Wu, M. Petrofsky, and L. E. Bermudez. 2005. A Mycobacterium avium PPE gene is associated with the ability of the bacterium to grow in macrophages and virulence in mice. Cellular Microbiology 7:539-548.
42	Malen, H., F. S. Berven, K. E. Fladmark, and H. G. Wiker. 2007. Comprehensive analysis of exported proteins from Mycobacterium tuberculosis H37Rv. Proteomics 7:1702-1718.
43	Malen, H., S. Pathak, T. Softeland, G. A. de Souza, and H. G. Wiker. 2010. Definition of novel cell envelope associated proteins in Triton X-114 extracts of Mycobacterium tuberculosis H37Rv. BMC Microbiology 10:132.
44	Mehta, P. K., A. K. Pandey, S. Subbian, S. H. El-Etr, S. L. Cirillo, M. M. Samrakandi, and J. D. Cirillo. 2006. Identification of Mycobacterium marinum macrophage infection mutants. Microbial Pathogenesis 40:139-151.
45	Mishra, K. C., C. de Chastellier, Y. Narayana, P. Bifani, A. K. Brown, G. S. Besra, V. M. Katoch, B. Joshi, K. N. Balaji, and L. Kremer. 2008. Functional role of the PE domain and immunogenicity of the Mycobacterium tuberculosis triacylglycerol hydrolase LipY. Infection and Immunity 76:127-140.
46	Mustafa, A. S., P. J. Cockle, F. Shaban, R. G. Hewinson, and H. M. Vordermeier. 2002. Immunogenicity of Mycobacterium tuberculosis RD1 region gene products in infected cattle. Clin Exp Immunol 130:37-42.
47	Mustafa, A. S., Y. A. Skeiky, R. Al-Attiyah, M. R. Alderson, R. G. Hewinson, and H. M. Vordermeier. 2006. Immunogenicity of Mycobacterium tuberculosis antigens in Mycobacterium bovis BCG-vaccinated and M. bovis-infected cattle. Infect Immun 74:4566-4572.
48	Nagata, R., S. Kawaji, Y. Minakawa, X. Wang, T. Yanaka, and Y. Mori. 2010. A specific induction of interleukin-10 by the Map41 recombinant PPE antigen of Mycobacterium avium subsp. paratuberculosis. Vet Immunol Immunopathol 135:71-78.
49	Nagata, R., Y. Muneta, K. Yoshihara, Y. Yokomizo, and Y. Mori. 2005. Expression cloning of gamma interferon-inducing antigens of Mycobacterium avium subsp. paratuberculosis. Infection and Immunity 73:3778-3782.
50	Nair, S., P. A. Ramaswamy, S. Ghosh, D. C. Joshi, N. Pathak, I. Siddiqui, P. Sharma, S. E. Hasnain, S. C. Mande, and S. Mukhopadhyay. 2009. The PPE18 of Mycobacterium tuberculosis interacts with TLR2 and activates IL-10 induction in macrophage. Journal of Immunology 183:6269-6281.
51	Narayana, Y., B. Joshi, V. M. Katoch, K. C. Mishra, and K. N. Balaji. 2007. Differential B-cell responses are induced by Mycobacterium tuberculosis PE antigens Rv1169c, Rv0978c, and Rv1818c. Clin Vaccine Immunol 14:1334-1341.
52	Newton, V., S. L. McKenna, and J. De Buck. 2009. Presence of PPE proteins in Mycobacterium avium subsp. paratuberculosis isolates and their immunogenicity in cattle. Veterinary Microbiology 135:394-400.
53	Okkels, L. M., I. Brock, F. Follmann, E. M. Agger, S. M. Arend, T. H. Ottenhoff, F. Oftung, I. Rosenkrands, and P. Andersen. 2003. PPE protein (Rv3873) from DNA segment RD1 of Mycobacterium tuberculosis: strong recognition of both specific T-cell epitopes and epitopes conserved within the PPE family. Infect Immun 71:6116-6123.
54	Parra, M., N. Cadieux, T. Pickett, V. Dheenadhayalan, and M. J. Brennan. 2006. A PE protein expressed by Mycobacterium avium is an effective T-cell immunogen. Infection and Immunity 74:786-789.
55	Ramakrishnan, L., N. A. Federspiel, and S. Falkow. 2000. Granuloma-specific expression of Mycobacterium virulence proteins from the glycine-rich PE-PGRS family. Science 288:1436-1439.
56	Reed S.G., R.N. Coler, W. Dalemans, E.V. Tan, E.C. DeLa Cruz, R.J. Basaraba, I.M. Orme, Y.A. Skeiky, M.R. Alderson, K.D. Cowgill, J.P. Prieels, R.M. Abalos, M. C. ubois, J. Cohen, P. Mettens, and Y. Lobet. 2009. Defined tuberculosis vaccine, Mtb72f/AS02A, evidence of protection in cynomolgous monkeys. PNAS. 106:2301-2306
57	Rengarajan, J., B. R. Bloom, and E. J. Rubin. 2005. Genome-wide requirements for Mycobacterium tuberculosis adaptation and survival in macrophages. Proceedings of the National Academy of Sciences U S A 102:8327-8332.
58	Romano, M., L. Rindi, H. Korf, D. Bonanni, P. Y. Adnet, F. Jurion, C. Garzelli, and K. Huygen. 2008. Immunogenicity and protective efficacy of tuberculosis subunit vaccines expressing PPE44 (Rv2770c). Vaccine 26:6053-6063.
59	Ruley, K. M., J. H. Ansede, C. L. Pritchett, A. M. Talaat, R. Reimschuessel, and M. Trucksis. 2004. Identification of Mycobacterium marinum virulence genes using signature-tagged mutagenesis and the goldfish model of mycobacterial pathogenesis. FEMS Microbiol Lett 232:75-81.
60	Sampson, S.L., P. Lukey, R.M. Warren, P. van Helden, M. Richardson, and M.J. Everett. 2001. Expression, characterization and subcellular localization of the Mycobacterium tuberculosis PPE gene Rv1917c. Tuberculosis 81:305-317
61	Sani, M., E. N. Houben, J. Geurtsen, J. Pierson, K. de Punder, M. van Zon, B. Wever, S. R. Piersma, C. R. Jimenez, M. Daffe, B. J. Appelmelk, W. Bitter, N. van der Wel, and P. J. Peters. 2010. Direct visualization by cryo-EM of the mycobacterial capsular layer: a labile structure containing ESX-1-secreted proteins. PLoS Pathogens 6:e1000794.
62	Sassetti, C. M., D. H. Boyd, and E. J. Rubin. 2003. Genes required for mycobacterial growth defined by high density mutagenesis. Molecular Microbiology 48:77-84.
63	Sassetti, C. M., and E. J. Rubin. 2003. Genetic requirements for mycobacterial survival during infection. Proceedings of the National Academy of Sciences U S A 100:12989-12994.
64	Sidders, B., C. Pirson, P. J. Hogarth, R. G. Hewinson, N. G. Stoker, H. M. Vordermeier, and K. Ewer. 2008. Screening of highly expressed mycobacterial genes identifies Rv3615c as a useful differential diagnostic antigen for the Mycobacterium tuberculosis complex. Infect Immun 76:3932-3939.
65	Singh, K. K., X. Zhang, A. S. Patibandla, P. Chien, Jr., and S. Laal. 2001. Antigens of Mycobacterium tuberculosis expressed during preclinical tuberculosis: serological immunodominance of proteins with repetitive amino acid sequences. Infection and Immunity 69:4185-4191.
66	Singh, P. P., M. Parra, N. Cadieux, and M. J. Brennan. 2008. A comparative study of host response to three Mycobacterium tuberculosis PE_PGRS proteins. Microbiology 154:3469-3479.
67	Skeiky, Y. A., P. J. Ovendale, S. Jen, M. R. Alderson, D. C. Dillon, S. Smith, C. B. Wilson, I. M. Orme, S. G. Reed, and A. Campos-Neto. 2000. T cell expression cloning of a Mycobacterium tuberculosis gene encoding a protective antigen associated with the early control of infection. Journal of Immunology 165:7140-7149.
68	Stewart, G. R., K. A. Wilkinson, S. M. Newton, S. M. Sullivan, O. Neyrolles, J. R. Wain, J. Patel, K. L. Pool, D. B. Young, and R. J. Wilkinson. 2005. Effect of deletion or overexpression of the 19-kilodalton lipoprotein Rv3763 on the innate response to Mycobacterium tuberculosis. Infect Immun 73:6831-6837.
69	Strong, M., M. R. Sawaya, S. Wang, M. Phillips, D. Cascio, and D. Eisenberg. 2006. Toward the structural genomics of complexes: crystal structure of a PE/PPE protein complex from Mycobacterium tuberculosis. Proceedings of the National Academy of Sciences U S A 103:8060-8065.
70	Talarico, S., M. D. Cave, B. Foxman, C. F. Marrs, L. Zhang, J. H. Bates, and Z. Yang. 2007. Association of Mycobacterium tuberculosis PE PGRS33 polymorphism with clinical and epidemiological characteristics. Tuberculosis (Edinb) 87:338-346.
71	Tsenova L., R. Harbacheuski, A.L. Moreira, E. Ellison, W. Dalemans, M.R. Alderson, B. Mathema, S.G. Reed, Y.A. Skeiky, and G. Kaplan. 2006. Evaluation of the Mtb72f polyprotein vaccine in a rabbit model of tuberculous meningitis. Infect. Immun. 74:2392-2401
72	Tundup, S., N. Pathak, M. Ramanadham, S. Mukhopadhyay, K. J. Murthy, N. Z. Ehtesham, and S. E. Hasnain. 2008. The co-operonic PE25/PPE41 protein complex of Mycobacterium tuberculosis elicits increased humoral and cell mediated immune response. PLoS One 3:e3586.
73	Vipond, J., R. Vipond, E. Allen-Vercoe, S. O. Clark, G. J. Hatch, K. E. Gooch, J. Bacon, T. Hampshire, H. Shuttleworth, N. P. Minton, K. Blake, A. Williams, and P. D. Marsh. 2006. Selection of novel TB vaccine candidates and their evaluation as DNA vaccines against aerosol challenge. Vaccine 24:6340-6350.
74	Wang, J., Y. Qie, B. Zhu, H. Zhang, Y. Xu, Q. Wang, J. Chen, W. Liu, and H. Wang. 2009. Evaluation of a recombinant BCG expressing antigen Ag85B and PPE protein Rv3425 from DNA segment RD11 of Mycobacterium tuberculosis in C57BL/6 mice. Medical Microbiology and Immunology 198:5-11.
75	Weldingh, K., I. Rosenkrands, L. M. Okkels, T. M. Doherty, and P. Andersen. 2005. Assessing the serodiagnostic potential of 35 Mycobacterium tuberculosis proteins and identification of four novel serological antigens. Journal of Clinical Microbiology 43:57-65.
76	Zhang, H., J. Wang, J. Lei, M. Zhang, Y. Yang, Y. Chen, and H. Wang. 2007. PPE protein (Rv3425) from DNA segment RD11 of Mycobacterium tuberculosis: a potential B-cell antigen used for serological diagnosis to distinguish vaccinated controls from tuberculosis patients. Clinical Microbiology and Infection 13:139-145.
